# Supplementary material for: SULFATION PATHWAYS: A role for steroid sulphatase in intracrine regulation of endometrial decidualisation
Source: PubMed Central journal article supplement (PMC6055542; doi:10.1530/jme-18-0037), 2018-05-02

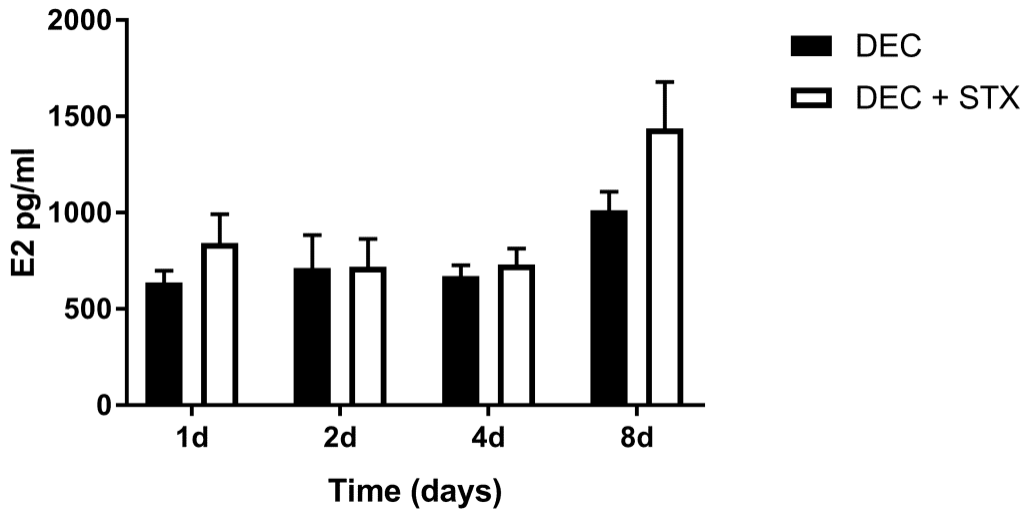

Supplement: jme-60-M57-s001.pdf [file jme-60-M57-s001.pdf]
