# Supplementary material for: SULFATION PATHWAYS: A role for steroid sulphatase in intracrine regulation of endometrial decidualisation
Source: PubMed Central journal article supplement (PMC6055542; doi:10.1530/jme-18-0037), 2018-05-02
Supplement: jme-60-M57-t001.pdf [file jme-60-M57-t001.pdf]

*Supplementary Table 1* - Primers and probes for qRT-PCR.

| <b>GOI</b>                   | <b>5' to 3'</b>           | <b>3' to 5'</b>        | <b>UPL probe</b> |
|------------------------------|---------------------------|------------------------|------------------|
| <b>STS</b>                   | cggaagtaatgggatctataaagg  | aacgaaggatgcctggaac    | 12               |
| <b>SULT1E1</b>               | tcatttgggaaaaggattgtaa    | ccagccaccattagaaagaaa  | 5                |
| <b>SULT1A1</b>               | cccacgactcctgaagacac      | gcgggcaacatagaccac     | 32               |
| <b>SULT2A1</b>               | tgagagaggagaaaaacttctgt   | tcttcccaggaattgacaga   | 17               |
| <b>SULT2B1 v1 (SULT2B1a)</b> | aacttctatttatcacctacgagga | ccaggaacccacagatgc     | 18               |
| <b>SLCO1A2</b>               | ggggcatgcaggatatatga      | tggaacaaagcttgatcctctt | 77               |
| <b>SLCO2B1</b>               | ataccgctacgacaacacca      | tgagcagttgccattggag    | 57               |
| <b>SLCO1B3</b>               | gcatagccctgaagtgtgtc      | ctgatgctggtttgaaatgat  | 10               |
| <b>SLCO1B1</b>               | ttcaagtggcaataaaaagccta   | cacccaaatgggctgagtaa   | 54               |
| <b>ABCC1</b>                 | aaggcctattacccagcat       | atgcagttgccacacact     | 83               |
| <b>ABCC4</b>                 | gaagcgctggaatctacaa       | agagcccctggagagaagat   | 47               |
| <b>PAPSS1</b>                | tccatgatgtatgctggac       | aaagttggctcctgaacc     | 59               |
| <b>PAPSS2</b>                | tgggggacaacatgtacaaa      | aaccagccagtccccact     | 9                |
