# Supplementary material for: SULFATION PATHWAYS: A role for steroid sulphatase in intracrine regulation of endometrial decidualisation
Source: PubMed Central journal article supplement (PMC6055542; doi:10.1530/jme-18-0037), 2018-05-02
Supplement: jme-60-M57-t003.pdf [file jme-60-M57-t003.pdf]

*Supplementary table 3* - Cross-reactivity of estradiol ELISA

| <b>STEROID</b>  | <b>% CROSS-REACTIVITY</b> |
|-----------------|---------------------------|
| Estradiol       | 100                       |
| Estrone         | <2                        |
| Estriol         | <0.15                     |
| Testosterone    | <0.01                     |
| DHEA            | <0.01                     |
| Androstenedione | 0                         |
